# Supplementary material
Source: MDPI journal article supplement (https://www.mdpi.com/2073-4352/12/2/243)
Supplement: s1 [file s1]

**Table S1.** Chemical compositions of serpentines in "Laoshan Jade" (wt.%).

| Number    | K <sub>2</sub> O | CaO  | TiO <sub>2</sub> | Na <sub>2</sub> O | MgO   | Al <sub>2</sub> O <sub>3</sub> | SiO <sub>2</sub> | Cr <sub>2</sub> O <sub>3</sub> | MnO  | TFeO | NiO  | Total |
|-----------|------------------|------|------------------|-------------------|-------|--------------------------------|------------------|--------------------------------|------|------|------|-------|
| YK-001-02 | 0.01             | 0.01 | 0.00             | 0.00              | 40.21 | 0.22                           | 44.37            | 0.03                           | 0.05 | 1.33 | 0.13 | 86.35 |
| YK-001-03 | 0.00             | 0.00 | 0.01             | 0.02              | 39.86 | 0.25                           | 44.04            | 0.02                           | 0.05 | 1.19 | 0.06 | 85.50 |
| YK-003-01 | 0.01             | 0.04 | 0.03             | 0.04              | 38.34 | 1.08                           | 42.92            | 0.07                           | 0.05 | 2.96 | 0.16 | 85.69 |
| YK-003-02 | 0.04             | 0.03 | 0.01             | 0.06              | 37.88 | 2.36                           | 41.36            | 0.80                           | 0.05 | 2.68 | 0.24 | 85.50 |
| YK-003-05 | 0.09             | 0.04 | 0.04             | 0.12              | 39.20 | 2.19                           | 40.97            | 0.47                           | 0.02 | 2.19 | 0.31 | 85.63 |
| YK-003-07 | 0.02             | 0.01 | 0.01             | 0.04              | 38.42 | 1.18                           | 42.88            | 0.11                           | 0.08 | 2.80 | 0.22 | 85.76 |
| YK-003-08 | 0.02             | 0.01 | 0.01             | 0.05              | 37.74 | 0.97                           | 43.02            | 0.09                           | 0.09 | 3.42 | 0.19 | 85.59 |
| YK-004-04 | 0.00             | 0.02 | 0.01             | 0.02              | 39.37 | 0.11                           | 43.64            | 0.05                           | 0.04 | 1.95 | 0.20 | 85.41 |
| YK-004-08 | 0.00             | 0.00 | 0.00             | 0.02              | 39.43 | 0.21                           | 43.97            | 0.06                           | 0.05 | 1.94 | 0.20 | 85.87 |
| YK-004-09 | 0.00             | 0.00 | 0.00             | 0.02              | 39.74 | 0.32                           | 43.68            | 0.09                           | 0.05 | 1.59 | 0.22 | 85.71 |
| YK-004-10 | 0.00             | 0.01 | 0.02             | 0.01              | 39.82 | 0.11                           | 43.52            | 0.00                           | 0.05 | 2.06 | 0.16 | 85.75 |
| YK-005-01 | 0.00             | 0.03 | 0.02             | 0.01              | 39.51 | 0.33                           | 44.72            | 0.03                           | 0.05 | 2.34 | 0.12 | 87.16 |
| YK-005-03 | 0.01             | 0.01 | 0.00             | 0.00              | 40.01 | 0.22                           | 44.23            | 0.05                           | 0.06 | 1.34 | 0.14 | 86.07 |
| YK-006-01 | 0.01             | 0.01 | 0.00             | 0.01              | 39.78 | 0.18                           | 43.85            | 0.13                           | 0.08 | 1.56 | 0.12 | 85.71 |
| YK-006-02 | 0.01             | 0.01 | 0.00             | 0.01              | 39.52 | 0.17                           | 43.59            | 0.07                           | 0.02 | 1.00 | 0.13 | 84.53 |
| YK-006-03 | 0.01             | 0.00 | 0.01             | 0.00              | 39.56 | 0.10                           | 44.05            | 0.05                           | 0.05 | 0.97 | 0.18 | 84.98 |
| YK-006-04 | 0.00             | 0.00 | 0.00             | 0.01              | 40.26 | 0.16                           | 43.79            | 0.00                           | 0.06 | 1.22 | 0.16 | 85.66 |
| YK-006-05 | 0.00             | 0.01 | 0.00             | 0.01              | 39.45 | 0.23                           | 43.20            | 0.16                           | 0.08 | 1.13 | 0.31 | 84.56 |
| YK-006-06 | 0.02             | 0.01 | 0.00             | 0.00              | 39.52 | 0.21                           | 43.47            | 0.10                           | 0.02 | 1.14 | 0.29 | 84.76 |
| YK-006-07 | 0.00             | 0.00 | 0.00             | 0.03              | 40.13 | 0.18                           | 43.66            | 0.12                           | 0.06 | 0.92 | 0.19 | 85.28 |
| YK-006-13 | 0.00             | 0.01 | 0.00             | 0.00              | 39.18 | 0.28                           | 43.55            | 0.31                           | 0.08 | 0.96 | 0.30 | 84.67 |
| YK-006-14 | 0.00             | 0.01 | 0.00             | 0.00              | 39.19 | 0.21                           | 43.49            | 0.31                           | 0.05 | 0.94 | 0.20 | 84.41 |
| YK-006-15 | 0.02             | 0.00 | 0.03             | 0.00              | 39.92 | 0.23                           | 43.51            | 0.24                           | 0.07 | 1.05 | 0.05 | 85.12 |
| YK-006-16 | 0.01             | 0.03 | 0.02             | 0.00              | 39.30 | 0.19                           | 43.29            | 0.14                           | 0.06 | 0.82 | 0.22 | 84.09 |
| YK-006-17 | 0.01             | 0.00 | 0.03             | 0.00              | 38.81 | 0.19                           | 43.11            | 0.20                           | 0.02 | 0.84 | 0.26 | 83.47 |
| YK-007-02 | 0.01             | 0.02 | 0.01             | 0.00              | 37.61 | 0.78                           | 43.47            | 0.15                           | 0.10 | 3.76 | 0.12 | 86.02 |
| YK-007-05 | 0.02             | 0.02 | 0.00             | 0.01              | 39.33 | 0.08                           | 44.05            | 0.02                           | 0.08 | 2.56 | 0.13 | 86.30 |
| YK-010-01 | 0.01             | 0.00 | 0.03             | 0.00              | 37.94 | 0.03                           | 44.19            | 0.00                           | 0.07 | 3.73 | 0.27 | 86.27 |
| YK-010-02 | 0.01             | 0.02 | 0.05             | 0.01              | 40.10 | 0.19                           | 42.51            | 0.01                           | 0.07 | 1.41 | 0.17 | 84.53 |
| YK-010-03 | 0.00             | 0.02 | 0.03             | 0.01              | 40.03 | 0.19                           | 42.62            | 0.02                           | 0.05 | 1.40 | 0.19 | 84.56 |
| YK-012-10 | 0.00             | 0.04 | 0.02             | 0.02              | 39.46 | 0.09                           | 44.18            | 0.00                           | 0.06 | 2.07 | 0.16 | 86.11 |
| YK-012-11 | 0.01             | 0.02 | 0.02             | 0.00              | 38.83 | 0.45                           | 43.27            | 0.07                           | 0.09 | 2.22 | 0.15 | 85.12 |
| YK-012-12 | 0.01             | 0.03 | 0.00             | 0.03              | 39.01 | 0.77                           | 42.86            | 0.07                           | 0.06 | 2.63 | 0.10 | 85.56 |
| YK-012-13 | 0.01             | 0.00 | 0.03             | 0.01              | 39.00 | 0.12                           | 43.81            | 0.00                           | 0.07 | 2.19 | 0.12 | 85.36 |
| YK-012-16 | 0.00             | 0.02 | 0.00             | 0.03              | 39.36 | 0.15                           | 44.24            | 0.03                           | 0.09 | 2.31 | 0.12 | 86.34 |
| YK-012-22 | 0.02             | 0.02 | 0.00             | 0.00              | 39.51 | 0.26                           | 43.60            | 0.02                           | 0.07 | 2.42 | 0.12 | 86.03 |
| YK-012-25 | 0.00             | 0.02 | 0.00             | 0.02              | 38.43 | 0.71                           | 41.08            | 0.01                           | 0.05 | 3.66 | 0.24 | 84.22 |
| Minimum   | 0.00             | 0.00 | 0.00             | 0.00              | 37.61 | 0.03                           | 40.97            | 0.00                           | 0.02 | 0.82 | 0.05 | 83.47 |
| Maximum   | 0.09             | 0.04 | 0.05             | 0.12              | 40.26 | 2.36                           | 44.72            | 0.80                           | 0.10 | 3.76 | 0.31 | 87.16 |
| Average   | 0.01             | 0.01 | 0.01             | 0.02              | 39.26 | 0.42                           | 43.40            | 0.11                           | 0.06 | 1.91 | 0.18 | 85.40 |

TFeO stands for total iron.

**Table S2.** Cation numbers based on 14 O of serpentine in "Laoshan Jade".

| Number    | K     | Ca    | Ti    | Na    | Mg    | Al    | Si    | Cr    | Mn    | Fe <sup>2+</sup> | Ni    | Total | Mg#    |
|-----------|-------|-------|-------|-------|-------|-------|-------|-------|-------|------------------|-------|-------|--------|
| YK-001-02 | 0.001 | 0.001 | 0.000 | 0.000 | 5.580 | 0.024 | 4.131 | 0.002 | 0.004 | 0.104            | 0.009 | 9.856 | 98.178 |
| YK-001-03 | 0.000 | 0.000 | 0.001 | 0.003 | 5.581 | 0.028 | 4.135 | 0.002 | 0.004 | 0.094            | 0.005 | 9.851 | 98.350 |
| YK-003-01 | 0.002 | 0.004 | 0.002 | 0.007 | 5.416 | 0.121 | 4.067 | 0.005 | 0.004 | 0.234            | 0.012 | 9.873 | 95.851 |
| YK-003-02 | 0.005 | 0.003 | 0.001 | 0.010 | 5.381 | 0.265 | 3.941 | 0.060 | 0.004 | 0.214            | 0.018 | 9.903 | 96.182 |
| YK-003-05 | 0.011 | 0.004 | 0.003 | 0.022 | 5.559 | 0.246 | 3.897 | 0.036 | 0.001 | 0.174            | 0.023 | 9.976 | 96.961 |
| YK-003-07 | 0.003 | 0.001 | 0.001 | 0.006 | 5.422 | 0.132 | 4.059 | 0.008 | 0.006 | 0.222            | 0.016 | 9.875 | 96.073 |
| YK-003-08 | 0.002 | 0.001 | 0.001 | 0.009 | 5.348 | 0.108 | 4.089 | 0.007 | 0.007 | 0.272            | 0.014 | 9.858 | 95.162 |
| YK-004-04 | 0.000 | 0.002 | 0.001 | 0.003 | 5.548 | 0.012 | 4.125 | 0.004 | 0.004 | 0.154            | 0.015 | 9.867 | 97.296 |
| YK-004-08 | 0.000 | 0.000 | 0.000 | 0.004 | 5.524 | 0.023 | 4.131 | 0.004 | 0.004 | 0.152            | 0.015 | 9.857 | 97.315 |
| YK-004-09 | 0.000 | 0.000 | 0.000 | 0.003 | 5.572 | 0.036 | 4.108 | 0.007 | 0.004 | 0.125            | 0.017 | 9.872 | 97.806 |
| YK-004-10 | 0.000 | 0.001 | 0.001 | 0.001 | 5.596 | 0.012 | 4.102 | 0.000 | 0.004 | 0.163            | 0.012 | 9.892 | 97.176 |
| YK-005-01 | 0.000 | 0.003 | 0.001 | 0.002 | 5.456 | 0.036 | 4.143 | 0.002 | 0.004 | 0.181            | 0.009 | 9.838 | 96.781 |
| YK-005-03 | 0.002 | 0.001 | 0.000 | 0.000 | 5.573 | 0.024 | 4.132 | 0.003 | 0.005 | 0.105            | 0.010 | 9.855 | 98.151 |
| YK-006-01 | 0.001 | 0.001 | 0.000 | 0.001 | 5.574 | 0.020 | 4.121 | 0.010 | 0.006 | 0.122            | 0.009 | 9.865 | 97.855 |
| YK-006-02 | 0.001 | 0.001 | 0.000 | 0.001 | 5.593 | 0.019 | 4.139 | 0.005 | 0.001 | 0.080            | 0.010 | 9.851 | 98.595 |
| YK-006-03 | 0.002 | 0.000 | 0.001 | 0.000 | 5.567 | 0.011 | 4.158 | 0.003 | 0.004 | 0.076            | 0.013 | 9.835 | 98.650 |
| YK-006-04 | 0.000 | 0.000 | 0.000 | 0.001 | 5.636 | 0.018 | 4.112 | 0.000 | 0.005 | 0.095            | 0.012 | 9.880 | 98.334 |
| YK-006-05 | 0.000 | 0.001 | 0.000 | 0.001 | 5.599 | 0.025 | 4.112 | 0.012 | 0.006 | 0.090            | 0.024 | 9.870 | 98.424 |
| YK-006-06 | 0.002 | 0.001 | 0.000 | 0.000 | 5.590 | 0.024 | 4.124 | 0.007 | 0.001 | 0.091            | 0.022 | 9.861 | 98.403 |
| YK-006-07 | 0.000 | 0.000 | 0.000 | 0.005 | 5.637 | 0.019 | 4.114 | 0.009 | 0.005 | 0.072            | 0.014 | 9.875 | 98.733 |
| YK-006-13 | 0.000 | 0.001 | 0.000 | 0.000 | 5.559 | 0.023 | 4.138 | 0.023 | 0.004 | 0.075            | 0.016 | 9.839 | 98.667 |
| YK-006-14 | 0.000 | 0.001 | 0.000 | 0.000 | 5.559 | 0.023 | 4.138 | 0.023 | 0.004 | 0.075            | 0.016 | 9.839 | 98.667 |
| YK-006-15 | 0.002 | 0.000 | 0.002 | 0.000 | 5.620 | 0.026 | 4.108 | 0.018 | 0.005 | 0.083            | 0.004 | 9.869 | 98.542 |
| YK-006-16 | 0.001 | 0.003 | 0.002 | 0.000 | 5.592 | 0.021 | 4.132 | 0.011 | 0.005 | 0.066            | 0.017 | 9.851 | 98.839 |
| YK-006-17 | 0.001 | 0.000 | 0.002 | 0.000 | 5.562 | 0.022 | 4.144 | 0.015 | 0.002 | 0.068            | 0.020 | 9.836 | 98.799 |
| YK-007-02 | 0.002 | 0.002 | 0.000 | 0.000 | 5.306 | 0.087 | 4.114 | 0.011 | 0.008 | 0.298            | 0.009 | 9.837 | 94.690 |
| YK-007-05 | 0.002 | 0.002 | 0.000 | 0.002 | 5.500 | 0.009 | 4.132 | 0.001 | 0.006 | 0.201            | 0.010 | 9.865 | 96.474 |
| YK-010-01 | 0.001 | 0.000 | 0.002 | 0.000 | 5.334 | 0.003 | 4.168 | 0.000 | 0.006 | 0.294            | 0.021 | 9.829 | 94.768 |
| YK-010-02 | 0.001 | 0.002 | 0.003 | 0.001 | 5.708 | 0.021 | 4.059 | 0.000 | 0.005 | 0.113            | 0.013 | 9.928 | 98.062 |
| YK-010-03 | 0.000 | 0.002 | 0.002 | 0.002 | 5.695 | 0.021 | 4.067 | 0.002 | 0.004 | 0.111            | 0.015 | 9.921 | 98.081 |
| YK-012-10 | 0.000 | 0.004 | 0.002 | 0.003 | 5.514 | 0.009 | 4.141 | 0.000 | 0.005 | 0.162            | 0.012 | 9.854 | 97.138 |
| YK-012-11 | 0.001 | 0.002 | 0.002 | 0.000 | 5.498 | 0.050 | 4.110 | 0.005 | 0.007 | 0.176            | 0.011 | 9.862 | 96.890 |
| YK-012-12 | 0.002 | 0.003 | 0.000 | 0.005 | 5.512 | 0.085 | 4.062 | 0.005 | 0.005 | 0.209            | 0.007 | 9.896 | 96.351 |
| YK-012-13 | 0.002 | 0.000 | 0.002 | 0.001 | 5.499 | 0.014 | 4.143 | 0.000 | 0.005 | 0.173            | 0.009 | 9.849 | 96.952 |
| YK-012-16 | 0.000 | 0.002 | 0.000 | 0.005 | 5.491 | 0.017 | 4.140 | 0.002 | 0.007 | 0.180            | 0.009 | 9.853 | 96.820 |
| YK-012-22 | 0.002 | 0.002 | 0.000 | 0.000 | 5.542 | 0.028 | 4.103 | 0.001 | 0.005 | 0.190            | 0.009 | 9.884 | 96.677 |
| YK-012-25 | 0.000 | 0.002 | 0.000 | 0.003 | 5.568 | 0.082 | 3.992 | 0.000 | 0.004 | 0.298            | 0.019 | 9.968 | 94.926 |

Mg#=100\*Mg<sup>2+</sup>/(Mg<sup>2+</sup>+Fe<sup>2+</sup>).

**Table S3.** Chemical compositions of chlorites in "Laoshan Jade" (wt.%).

| Number    | K <sub>2</sub> O | CaO  | TiO <sub>2</sub> | Na <sub>2</sub> O | MgO   | Al <sub>2</sub> O <sub>3</sub> | SiO <sub>2</sub> | Cr <sub>2</sub> O <sub>3</sub> | MnO  | TFeO | NiO  | Total |
|-----------|------------------|------|------------------|-------------------|-------|--------------------------------|------------------|--------------------------------|------|------|------|-------|
| YK-001-01 | 0.00             | 0.00 | 0.04             | 0.04              | 33.05 | 15.16                          | 32.40            | 0.80                           | 0.00 | 3.75 | 0.33 | 85.56 |
| YK-001-04 | 0.01             | 0.00 | 0.04             | 0.02              | 32.60 | 15.43                          | 31.99            | 0.81                           | 0.02 | 3.53 | 0.35 | 84.78 |
| YK-001-05 | 0.02             | 0.00 | 0.04             | 0.02              | 32.98 | 15.33                          | 31.98            | 0.78                           | 0.04 | 3.46 | 0.32 | 84.96 |
| YK-002-02 | 0.03             | 0.03 | 0.03             | 0.01              | 35.61 | 9.04                           | 36.31            | 0.98                           | 0.01 | 2.78 | 0.26 | 85.07 |
| YK-002-03 | 0.00             | 0.00 | 0.07             | 0.02              | 31.92 | 17.61                          | 30.81            | 1.26                           | 0.01 | 2.73 | 0.16 | 84.57 |
| YK-003-03 | 0.22             | 0.03 | 0.00             | 0.14              | 33.42 | 14.29                          | 32.76            | 1.22                           | 0.04 | 3.01 | 0.24 | 85.37 |
| YK-004-01 | 0.01             | 0.01 | 0.07             | 0.00              | 32.81 | 15.78                          | 31.10            | 1.64                           | 0.01 | 2.95 | 0.20 | 84.56 |
| YK-004-02 | 0.00             | 0.00 | 0.02             | 0.02              | 32.46 | 16.13                          | 31.17            | 1.65                           | 0.03 | 3.27 | 0.26 | 85.01 |
| YK-004-03 | 0.00             | 0.01 | 0.12             | 0.00              | 33.16 | 14.44                          | 32.08            | 2.12                           | 0.01 | 2.99 | 0.19 | 85.12 |
| YK-005-02 | 0.06             | 0.03 | 0.05             | 0.07              | 32.26 | 15.64                          | 31.22            | 1.12                           | 0.01 | 2.91 | 0.13 | 83.50 |
| YK-007-01 | 0.03             | 0.05 | 0.03             | 0.04              | 33.59 | 14.27                          | 33.61            | 1.28                           | 0.02 | 2.89 | 0.18 | 85.99 |
| YK-007-03 | 0.04             | 0.03 | 0.05             | 0.05              | 31.67 | 17.15                          | 30.70            | 1.07                           | 0.04 | 3.18 | 0.19 | 84.16 |
| YK-007-04 | 0.02             | 0.04 | 0.02             | 0.00              | 32.11 | 16.30                          | 30.98            | 1.23                           | 0.01 | 3.30 | 0.23 | 84.24 |
| YK-012-18 | 0.06             | 0.08 | 0.05             | 0.01              | 35.58 | 7.75                           | 36.59            | 1.22                           | 0.07 | 2.79 | 0.11 | 84.30 |
| YK-012-19 | 0.05             | 0.11 | 0.30             | 0.04              | 29.62 | 10.20                          | 33.35            | 1.58                           | 0.80 | 7.81 | 0.15 | 84.00 |
| YK-012-20 | 0.01             | 0.01 | 0.03             | 0.00              | 31.35 | 18.47                          | 29.66            | 1.29                           | 0.00 | 3.74 | 0.29 | 84.84 |
| Minimum   | 0.00             | 0.00 | 0.00             | 0.00              | 29.62 | 7.75                           | 29.66            | 0.78                           | 0.00 | 2.73 | 0.11 | 83.50 |
| Maximum   | 0.22             | 0.11 | 0.30             | 0.14              | 35.61 | 18.47                          | 36.59            | 2.12                           | 0.80 | 7.81 | 0.35 | 85.99 |
| Average   | 0.03             | 0.03 | 0.06             | 0.03              | 32.76 | 14.56                          | 32.29            | 1.25                           | 0.07 | 3.44 | 0.22 | 84.75 |

TFeO stands for total iron.

**Table S4.** Cation numbers based on 14 O of chlorites in "Laoshan Jade".

| Number           | YK-001-01 | YK-001-04 | YK-001-05 | YK-002-02 | YK-002-03 | YK-003-03 | YK-004-01 | YK-004-02 | YK-004-03 | YK-005-02 | YK-007-01 | YK-007-03 | YK-007-04 | YK-012-18 | YK-012-19 | YK-012-20 |
|------------------|-----------|-----------|-----------|-----------|-----------|-----------|-----------|-----------|-----------|-----------|-----------|-----------|-----------|-----------|-----------|-----------|
| K                | 0.000     | 0.001     | 0.002     | 0.003     | 0.000     | 0.027     | 0.001     | 0.000     | 0.000     | 0.007     | 0.003     | 0.005     | 0.003     | 0.007     | 0.007     | 0.001     |
| Ca               | 0.000     | 0.000     | 0.000     | 0.003     | 0.000     | 0.003     | 0.001     | 0.000     | 0.001     | 0.003     | 0.005     | 0.003     | 0.004     | 0.009     | 0.012     | 0.001     |
| Ti               | 0.003     | 0.003     | 0.003     | 0.002     | 0.005     | 0.000     | 0.005     | 0.002     | 0.009     | 0.004     | 0.002     | 0.003     | 0.001     | 0.004     | 0.022     | 0.002     |
| Na               | 0.007     | 0.003     | 0.003     | 0.001     | 0.003     | 0.025     | 0.000     | 0.004     | 0.000     | 0.013     | 0.008     | 0.009     | 0.001     | 0.002     | 0.007     | 0.000     |
| Mg               | 4.748     | 4.721     | 4.766     | 5.109     | 4.615     | 4.807     | 4.766     | 4.698     | 4.790     | 4.733     | 4.776     | 4.616     | 4.682     | 5.155     | 4.456     | 4.555     |
| Al               | 1.721     | 1.766     | 1.752     | 1.025     | 2.013     | 1.625     | 1.811     | 1.845     | 1.649     | 1.814     | 1.604     | 1.975     | 1.879     | 0.887     | 1.213     | 2.121     |
| Si               | 3.122     | 3.107     | 3.100     | 3.494     | 2.988     | 3.161     | 3.030     | 3.025     | 3.108     | 3.072     | 3.206     | 3.001     | 3.030     | 3.556     | 3.366     | 2.890     |
| Cr               | 0.061     | 0.062     | 0.060     | 0.075     | 0.096     | 0.093     | 0.126     | 0.127     | 0.162     | 0.087     | 0.096     | 0.083     | 0.095     | 0.094     | 0.126     | 0.099     |
| Mn               | 0.000     | 0.001     | 0.003     | 0.001     | 0.001     | 0.004     | 0.001     | 0.003     | 0.001     | 0.001     | 0.002     | 0.004     | 0.001     | 0.006     | 0.068     | 0.000     |
| Fe <sup>2+</sup> | 0.302     | 0.287     | 0.280     | 0.223     | 0.221     | 0.243     | 0.240     | 0.265     | 0.242     | 0.239     | 0.230     | 0.260     | 0.270     | 0.227     | 0.659     | 0.305     |
| Ni               | 0.025     | 0.027     | 0.025     | 0.020     | 0.012     | 0.018     | 0.016     | 0.020     | 0.015     | 0.010     | 0.014     | 0.015     | 0.018     | 0.008     | 0.013     | 0.023     |
| Total            | 9.988     | 9.978     | 9.994     | 9.956     | 9.954     | 10.007    | 9.997     | 9.989     | 9.977     | 9.984     | 9.947     | 9.974     | 9.983     | 9.954     | 9.949     | 9.998     |
| Al+□             | 1.817     | 1.863     | 1.848     | 1.130     | 2.130     | 1.795     | 1.961     | 2.001     | 1.837     | 1.939     | 1.734     | 2.097     | 2.002     | 1.017     | 1.468     | 2.247     |
| Al/(Al+Mg+Fe)    | 0.254     | 0.261     | 0.258     | 0.161     | 0.294     | 0.243     | 0.266     | 0.271     | 0.247     | 0.267     | 0.243     | 0.288     | 0.275     | 0.141     | 0.192     | 0.304     |
| Al <sup>IV</sup> | 0.878     | 0.893     | 0.900     | 0.506     | 1.012     | 0.839     | 0.970     | 0.975     | 0.892     | 0.928     | 0.794     | 0.999     | 0.970     | 0.444     | 0.634     | 1.110     |
| Al <sup>VI</sup> | 0.843     | 0.873     | 0.852     | 0.519     | 1.001     | 0.786     | 0.841     | 0.870     | 0.757     | 0.886     | 0.810     | 0.976     | 0.909     | 0.443     | 0.579     | 1.012     |

a. Al<sup>IV</sup> is the four-coordinated Al. b. Al<sup>VI</sup> is the six-coordinated Al. c. □ is the octahedral vacancy.

**Table S5.** Chemical compositions of spinel group minerals in "Laoshan Jade" (wt.%).

| Spinel group minerals | Number    | Mineral       | K <sub>2</sub> O | CaO   | TiO <sub>2</sub> | Na <sub>2</sub> O | MgO    | Al <sub>2</sub> O <sub>3</sub> | SiO <sub>2</sub> | Cr <sub>2</sub> O <sub>3</sub> | MnO    | TFeO   | NiO    | Total  | FeO    | Fe <sub>2</sub> O <sub>3</sub> |
|-----------------------|-----------|---------------|------------------|-------|------------------|-------------------|--------|--------------------------------|------------------|--------------------------------|--------|--------|--------|--------|--------|--------------------------------|
| Magnetite             | YK-002-04 | Magnetite     | 0.004            | 0.000 | 0.089            | 0.011             | 0.656  | 0.004                          | 0.059            | 0.067                          | 0.164  | 91.858 | 0.463  | 93.375 | 29.603 | 69.187                         |
|                       | YK-002-05 | Magnetite     | 0.012            | 0.011 | 0.169            | 0.000             | 0.600  | 0.028                          | 0.029            | 0.025                          | 0.164  | 92.509 | 0.596  | 94.143 | 29.860 | 69.624                         |
|                       | YK-003-04 | Magnetite     | 0.017            | 0.053 | 0.008            | 0.203             | 0.303  | 0.007                          | 0.055            | 0.058                          | 0.363  | 91.357 | 0.635  | 93.059 | 28.686 | 69.649                         |
|                       | YK-006-12 | Magnetite     | 0.014            | 0.007 | 0.018            | 0.000             | 0.328  | 0.010                          | 0.000            | 2.332                          | 0.168  | 89.371 | 0.598  | 92.846 | 29.623 | 66.400                         |
|                       | YK-010-04 | Magnetite     | 0.000            | 0.000 | 0.161            | 0.000             | 0.327  | 0.002                          | 0.067            | 0.087                          | 0.103  | 92.201 | 0.484  | 93.432 | 30.293 | 68.801                         |
|                       | YK-012-21 | Magnetite     | 0.000            | 0.013 | 0.131            | 0.019             | 0.243  | 0.012                          | 0.000            | 0.116                          | 0.343  | 92.406 | 0.452  | 93.735 | 30.106 | 69.236                         |
|                       |           | Minimum       | 0.000            | 0.000 | 0.000            | 0.008             | 0.000  | 0.243                          | 0.002            | 0.000                          | 0.025  | 0.103  | 89.371 | 0.452  | 92.846 | 28.686                         |
|                       |           | Maximum       | 0.017            | 0.017 | 0.053            | 0.169             | 0.203  | 0.656                          | 0.028            | 0.067                          | 2.332  | 0.363  | 92.509 | 0.635  | 94.143 | 30.293                         |
|                       |           | Average       | 0.008            | 0.008 | 0.014            | 0.096             | 0.039  | 0.410                          | 0.011            | 0.035                          | 0.448  | 0.218  | 91.617 | 0.538  | 93.432 | 29.695                         |
| The core of chromite  | YK-003-06 | alumochromite | 0.016            | 0.000 | 0.182            | 0.045             | 6.811  | 17.473                         | 0.028            | 45.080                         | 0.292  | 27.606 | 0.058  | 97.591 | 23.335 | 4.746                          |
|                       | YK-003-09 | alumochromite | 0.029            | 0.029 | 0.101            | 0.156             | 7.044  | 19.127                         | 0.036            | 43.209                         | 0.269  | 27.168 | 0.047  | 97.215 | 22.551 | 5.131                          |
|                       | YK-003-11 | alumochromite | 0.005            | 0.000 | 0.083            | 0.021             | 7.651  | 22.225                         | 0.000            | 39.827                         | 0.334  | 25.899 | 0.015  | 96.060 | 22.302 | 3.998                          |
|                       | YK-003-12 | alumochromite | 0.081            | 0.000 | 0.119            | 0.095             | 6.869  | 17.514                         | 0.037            | 44.608                         | 0.321  | 27.753 | 0.051  | 97.448 | 22.751 | 5.559                          |
|                       | YK-006-08 | chromite      | 0.000            | 0.008 | 0.047            | 0.017             | 11.343 | 12.631                         | 0.055            | 55.027                         | 0.249  | 19.338 | 0.032  | 98.747 | 16.121 | 3.575                          |
|                       | YK-006-11 | chromite      | 0.017            | 0.028 | 0.045            | 0.000             | 10.611 | 11.854                         | 0.025            | 56.061                         | 0.242  | 17.998 | 0.000  | 96.881 | 16.486 | 1.680                          |
|                       |           | Minimum       | 0                | 0.000 | 0.000            | 0.045             | 0.000  | 6.811                          | 11.854           | 0.000                          | 39.827 | 0.242  | 17.998 | 0.000  | 96.060 | 16.121                         |
|                       |           | Maximum       | 0.081            | 0.081 | 0.029            | 0.182             | 0.156  | 11.343                         | 22.225           | 0.055                          | 56.061 | 0.334  | 27.753 | 0.058  | 98.747 | 23.335                         |
|                       |           | Average       | 0.025            | 0.025 | 0.011            | 0.096             | 0.056  | 8.388                          | 16.804           | 0.030                          | 47.302 | 0.285  | 24.294 | 0.034  | 97.324 | 20.591                         |
| The edge of chromite  | YK-003-10 | magnetite     | 0.005            | 0.000 | 0.251            | 0.037             | 0.439  | 0.002                          | 0.074            | 1.204                          | 0.127  | 90.821 | 0.609  | 93.569 | 29.919 | 67.683                         |
|                       | YK-006-09 | magnetite     | 0.000            | 0.000 | 0.000            | 0.000             | 0.623  | 0.018                          | 0.259            | 5.641                          | 0.707  | 84.375 | 0.545  | 92.168 | 28.757 | 61.811                         |
|                       | YK-006-10 | magnetite     | 0.021            | 0.000 | 0.018            | 0.000             | 0.797  | 0.011                          | 0.061            | 14.403                         | 2.050  | 76.882 | 0.453  | 94.696 | 27.615 | 54.753                         |
|                       |           | Minimum       | 0                | 0.000 | 0.000            | 0.000             | 0.000  | 0.439                          | 0.002            | 0.061                          | 1.204  | 0.127  | 76.882 | 0.453  | 92.168 | 27.615                         |
|                       |           | Maximum       | 0.021            | 0.021 | 0.000            | 0.251             | 0.037  | 0.797                          | 0.018            | 0.259                          | 14.403 | 2.050  | 90.821 | 0.609  | 94.696 | 29.919                         |
|                       |           | Average       | 0.009            | 0.009 | 0.000            | 0.090             | 0.012  | 0.620                          | 0.010            | 0.131                          | 7.083  | 0.961  | 84.026 | 0.536  | 93.478 | 28.764                         |

TFeO stands for total iron.

**Table S6.** Cation number of each element of spinel group minerals in "Laoshan Jade" based on 4 oxygens.

| Spinel group minerals | Number    | Mineral       | K     | Ca    | Ti    | Na    | Mg    | Al    | Si    | Cr    | Mn    | Fe <sup>2+</sup> | Fe <sup>3+</sup> | Ni    | Total | Cr#    | Mg#    | Fe <sup>3+</sup> /Fe <sup>2+</sup> |
|-----------------------|-----------|---------------|-------|-------|-------|-------|-------|-------|-------|-------|-------|------------------|------------------|-------|-------|--------|--------|------------------------------------|
| Magnetite             | YK-002-04 | Magnetite     | 0.000 | 0.000 | 0.003 | 0.001 | 0.037 | 0.000 | 0.002 | 0.002 | 0.005 | 0.946            | 1.989            | 0.014 | 3.000 | 91.827 | 3.801  | 2.103                              |
|                       | YK-002-05 | Magnetite     | 0.001 | 0.000 | 0.005 | 0.000 | 0.034 | 0.001 | 0.001 | 0.001 | 0.005 | 0.947            | 1.987            | 0.018 | 3.000 | 37.458 | 3.459  | 2.098                              |
|                       | YK-003-04 | Magnetite     | 0.001 | 0.002 | 0.000 | 0.015 | 0.017 | 0.000 | 0.002 | 0.002 | 0.012 | 0.920            | 2.009            | 0.020 | 3.000 | 84.751 | 1.848  | 2.185                              |
|                       | YK-006-12 | Magnetite     | 0.001 | 0.000 | 0.001 | 0.000 | 0.019 | 0.001 | 0.000 | 0.071 | 0.006 | 0.956            | 1.928            | 0.019 | 3.000 | 99.365 | 1.936  | 2.017                              |
|                       | YK-010-04 | Magnetite     | 0.000 | 0.000 | 0.005 | 0.000 | 0.019 | 0.000 | 0.003 | 0.003 | 0.003 | 0.970            | 1.983            | 0.015 | 3.000 | 96.687 | 1.888  | 2.044                              |
|                       | YK-012-21 | Magnetite     | 0.000 | 0.001 | 0.004 | 0.001 | 0.014 | 0.001 | 0.000 | 0.004 | 0.011 | 0.962            | 1.990            | 0.014 | 3.000 | 86.639 | 1.419  | 2.069                              |
| The core of chromite  | YK-003-06 | alumochromite | 0.001 | 0.000 | 0.005 | 0.003 | 0.338 | 0.686 | 0.001 | 1.188 | 0.008 | 0.650            | 0.119            | 0.002 | 3.000 | 63.378 | 34.227 | 0.183                              |
|                       | YK-003-09 | alumochromite | 0.001 | 0.001 | 0.003 | 0.010 | 0.348 | 0.746 | 0.001 | 1.130 | 0.008 | 0.624            | 0.128            | 0.001 | 3.000 | 60.244 | 35.769 | 0.205                              |
|                       | YK-003-11 | alumochromite | 0.000 | 0.000 | 0.002 | 0.001 | 0.375 | 0.862 | 0.000 | 1.036 | 0.009 | 0.614            | 0.099            | 0.000 | 3.000 | 54.588 | 37.952 | 0.161                              |
|                       | YK-003-12 | alumochromite | 0.003 | 0.000 | 0.003 | 0.006 | 0.341 | 0.687 | 0.001 | 1.174 | 0.009 | 0.634            | 0.139            | 0.001 | 3.000 | 63.079 | 34.993 | 0.220                              |
|                       | YK-006-08 | chromite      | 0.000 | 0.000 | 0.001 | 0.001 | 0.552 | 0.486 | 0.002 | 1.421 | 0.007 | 0.440            | 0.088            | 0.001 | 3.000 | 74.505 | 55.643 | 0.200                              |
|                       | YK-006-11 | chromite      | 0.001 | 0.001 | 0.001 | 0.000 | 0.530 | 0.468 | 0.001 | 1.486 | 0.007 | 0.462            | 0.042            | 0.000 | 3.000 | 76.033 | 53.435 | 0.092                              |
| The edge of chromite  | YK-003-10 | magnetite     | 0.000 | 0.000 | 0.007 | 0.003 | 0.025 | 0.000 | 0.003 | 0.036 | 0.004 | 0.956            | 1.946            | 0.019 | 3.000 | 99.753 | 2.549  | 2.036                              |
|                       | YK-006-09 | magnetite     | 0.000 | 0.000 | 0.000 | 0.000 | 0.036 | 0.001 | 0.010 | 0.173 | 0.023 | 0.934            | 1.806            | 0.017 | 3.000 | 99.527 | 3.719  | 1.934                              |
|                       | YK-006-10 | magnetite     | 0.001 | 0.000 | 0.001 | 0.000 | 0.045 | 0.001 | 0.002 | 0.432 | 0.066 | 0.876            | 1.563            | 0.014 | 3.000 | 99.886 | 4.894  | 1.784                              |

Cr#=100\*Cr<sup>3+</sup>/(Al<sup>3+</sup>+Cr<sup>3+</sup>)    Mg#=100\*Mg<sup>2+</sup>/(Mg<sup>2+</sup>+Fe<sup>2+</sup>).

**Table S7.** Chemical compositions of olivine in "Laoshan Jade" (wt.%).

| Number                         | YK-012-01 | YK-012-02 | YK-012-03 | YK-012-04 | YK-012-05 | YK-012-06 | Minimum | Maximum | Average |
|--------------------------------|-----------|-----------|-----------|-----------|-----------|-----------|---------|---------|---------|
| K <sub>2</sub> O               | 0.000     | 0.000     | 0.000     | 0.009     | 0.000     | 0.013     | 0.000   | 0.013   | 0.004   |
| CaO                            | 0.000     | 0.000     | 0.003     | 0.015     | 0.035     | 0.023     | 0.000   | 0.035   | 0.013   |
| TiO <sub>2</sub>               | 0.000     | 0.000     | 0.032     | 0.000     | 0.002     | 0.012     | 0.000   | 0.032   | 0.008   |
| Na <sub>2</sub> O              | 0.017     | 0.000     | 0.000     | 0.000     | 0.018     | 0.000     | 0.000   | 0.018   | 0.006   |
| MgO                            | 48.596    | 49.024    | 48.510    | 48.863    | 48.926    | 48.920    | 48.510  | 49.024  | 48.807  |
| Al <sub>2</sub> O <sub>3</sub> | 0.007     | 0.000     | 0.000     | 0.000     | 0.000     | 0.003     | 0.000   | 0.007   | 0.002   |
| SiO <sub>2</sub>               | 40.408    | 40.509    | 40.396    | 40.766    | 40.530    | 40.647    | 40.396  | 40.766  | 40.543  |
| Cr <sub>2</sub> O <sub>3</sub> | 0.000     | 0.000     | 0.000     | 0.001     | 0.000     | 0.029     | 0.000   | 0.029   | 0.005   |
| MnO                            | 0.169     | 0.189     | 0.196     | 0.164     | 0.187     | 0.141     | 0.141   | 0.196   | 0.174   |
| TFeO                           | 9.801     | 10.101    | 9.978     | 9.864     | 9.911     | 9.850     | 9.801   | 10.101  | 9.918   |
| NiO                            | 0.365     | 0.360     | 0.304     | 0.363     | 0.380     | 0.401     | 0.304   | 0.401   | 0.362   |
| Total                          | 99.363    | 100.183   | 99.419    | 100.045   | 99.989    | 100.039   | 99.363  | 100.183 | 99.840  |

TFeO stands for total iron.

**Table S8.** Cation number of each element of olivine in "Laoshan Jade" based on 4 oxygens.

| Number           | YK-012-01 | YK-012-02 | YK-012-03 | YK-012-04 | YK-012-05 | YK-012-06 |
|------------------|-----------|-----------|-----------|-----------|-----------|-----------|
| K                | 0.000     | 0.000     | 0.000     | 0.000     | 0.000     | 0.000     |
| Ca               | 0.000     | 0.000     | 0.000     | 0.000     | 0.001     | 0.001     |
| Ti               | 0.000     | 0.000     | 0.001     | 0.000     | 0.000     | 0.000     |
| Na               | 0.001     | 0.000     | 0.000     | 0.000     | 0.001     | 0.000     |
| Mg               | 1.788     | 1.790     | 1.786     | 1.787     | 1.789     | 1.789     |
| Al               | 0.000     | 0.000     | 0.000     | 0.000     | 0.000     | 0.000     |
| Si               | 0.997     | 0.992     | 0.997     | 1.000     | 0.994     | 0.997     |
| Cr               | 0.000     | 0.000     | 0.000     | 0.000     | 0.000     | 0.001     |
| Mn               | 0.004     | 0.004     | 0.004     | 0.003     | 0.004     | 0.003     |
| Fe <sup>2+</sup> | 0.197     | 0.191     | 0.202     | 0.202     | 0.191     | 0.196     |
| Fe <sup>3+</sup> | 0.006     | 0.016     | 0.004     | 0.001     | 0.012     | 0.006     |
| Ni               | 0.007     | 0.007     | 0.006     | 0.007     | 0.007     | 0.008     |
| Total            | 3.000     | 3.000     | 3.000     | 3.000     | 3.000     | 3.000     |
| Fo               | 90.10     | 90.35     | 89.83     | 89.86     | 90.36     | 90.11     |

Fo=Mg#=100\*Mg<sup>2+</sup>/(Mg<sup>2+</sup>+Fe<sup>2+</sup>).

**Table S9.** Chemical compositions of pyroxene in "Laoshan Jade" (wt.%).

| Number                         | YK-012-07 | YK-012-08 | YK-012-09 | YK-012-17 | YK-012-23 | YK-012-24 | Minimum | Maximum | Average |
|--------------------------------|-----------|-----------|-----------|-----------|-----------|-----------|---------|---------|---------|
| K <sub>2</sub> O               | 0.012     | 0.000     | 0.021     | 0.013     | 0.006     | 0.000     | 0.000   | 0.021   | 0.009   |
| CaO                            | 24.590    | 24.690    | 23.120    | 13.172    | 24.458    | 23.069    | 13.172  | 24.690  | 22.183  |
| TiO <sub>2</sub>               | 0.018     | 0.025     | 0.082     | 0.007     | 0.097     | 0.016     | 0.007   | 0.097   | 0.041   |
| Na <sub>2</sub> O              | 0.011     | 0.026     | 0.035     | 0.019     | 0.038     | 0.830     | 0.011   | 0.830   | 0.160   |
| MgO                            | 18.740    | 18.358    | 19.334    | 23.861    | 18.479    | 16.552    | 16.552  | 23.861  | 19.221  |
| Al <sub>2</sub> O <sub>3</sub> | 0.044     | 0.031     | 0.162     | 0.074     | 0.139     | 0.742     | 0.031   | 0.742   | 0.199   |
| SiO <sub>2</sub>               | 54.917    | 55.148    | 53.967    | 57.571    | 54.617    | 53.905    | 53.905  | 57.571  | 55.021  |
| Cr <sub>2</sub> O <sub>3</sub> | 0.000     | 0.021     | 0.048     | 0.120     | 0.023     | 0.774     | 0.000   | 0.774   | 0.164   |
| MnO                            | 0.072     | 0.080     | 0.181     | 0.033     | 0.144     | 0.065     | 0.033   | 0.181   | 0.096   |
| TFeO                           | 0.839     | 0.970     | 0.975     | 1.141     | 0.864     | 1.895     | 0.839   | 1.895   | 1.114   |
| NiO                            | 0.029     | 0.082     | 0.000     | 0.044     | 0.000     | 0.027     | 0.000   | 0.082   | 0.030   |
| Total                          | 99.272    | 99.431    | 97.925    | 96.055    | 98.865    | 97.875    | 96.055  | 99.431  | 98.237  |

TFeO stands for total iron.

**Table S10.** Cation number of each element of pyroxene in "Laoshan Jade" based on 4 oxygens.

| Number                  | YK-012-07 | YK-012-08 | YK-012-09 | YK-012-17 | YK-012-23 | YK-012-24 |
|-------------------------|-----------|-----------|-----------|-----------|-----------|-----------|
| K                       | 0.001     | 0.000     | 0.001     | 0.001     | 0.000     | 0.000     |
| Ca                      | 0.957     | 0.962     | 0.910     | 0.520     | 0.957     | 0.915     |
| Ti                      | 0.000     | 0.001     | 0.002     | 0.000     | 0.003     | 0.000     |
| Na                      | 0.001     | 0.002     | 0.002     | 0.001     | 0.003     | 0.060     |
| Mg                      | 1.015     | 0.995     | 1.059     | 1.311     | 1.006     | 0.913     |
| Al                      | 0.002     | 0.001     | 0.007     | 0.003     | 0.006     | 0.032     |
| Si                      | 1.995     | 2.005     | 1.982     | 2.122     | 1.994     | 1.995     |
| Cr                      | 0.000     | 0.001     | 0.001     | 0.003     | 0.001     | 0.023     |
| Mn                      | 0.002     | 0.002     | 0.006     | 0.001     | 0.004     | 0.002     |
| Fe <sup>2+</sup>        | 0.018     | 0.029     | 0.003     | 0.035     | 0.024     | 0.046     |
| Fe <sup>3+</sup>        | 0.008     | 0.000     | 0.027     | 0.000     | 0.003     | 0.013     |
| Ni                      | 0.001     | 0.002     | 0.000     | 0.001     | 0.000     | 0.001     |
| Total                   | 4.000     | 4.000     | 4.000     | 4.000     | 4.000     | 4.000     |
| Mg#                     | 98.273    | 97.122    | 99.677    | 97.388    | 97.681    | 95.246    |
| Wo(CaSiO <sub>3</sub> ) | 47.80     | 48.22     | 45.24     | 27.75     | 47.84     | 46.38     |
| En(MgSiO <sub>3</sub> ) | 50.69     | 49.90     | 52.64     | 69.95     | 50.30     | 46.31     |
| Fs(FeSiO <sub>3</sub> ) | 0.89      | 1.48      | 0.17      | 1.88      | 1.19      | 2.31      |

Mg#=100\*Mg<sup>2+</sup>/(Mg<sup>2+</sup>+Fe<sup>2+</sup>) Wo=100\*Ca<sup>2+</sup>/R<sup>2+</sup> En= 100\*Mg<sup>2+</sup>/R<sup>2+</sup> Fs= 100\*Fe<sup>2+</sup>/R<sup>2+</sup>.
